# Supplementary material
Source: publisher figshare collection journal article supplement (https://future-science-group.figshare.com/ndownloader/files/34921689)
Supplement: Supplementary file 1 [file 34921689]

## Sheet: Supplementary Table 6
Supplementary Table 6. Mean beta-value of each CpG markers
sampleID	cg00002810	cg00012692	cg00013899	cg00014112	cg00014752	cg00015530	cg00026222	cg00027081	cg00029282	cg00045532	cg00046625	cg00072839	cg00073794	cg00092551	cg00102183	cg00103785	cg00127894	cg00148025	cg00153856	cg00155679	cg00166234	cg00171166	cg00216804	cg00226923	cg00243272	cg00244001	cg00260803	cg00277591	cg00283857	cg00286701	cg00293626	cg00306284	cg00306851	cg00313722	cg00338329	cg00340349	cg00350296	cg00359325	cg00390143	cg00405198	cg00417147	cg00429618	cg00458454	cg00472758	cg00483503	cg00487187	cg00491603	cg00500540	cg00501272
CUP_061	0.0286533	0.6	0.768293	0.0299576	0.0340426	0.696281	0.179724	0.20297	0.925636	0.993802	0.0434783	0	0.752711	0.828431	0.845794	0.121495	0.00787402	1	0.00198807	0.954628	0.951402	0.909956	0.918605	1	0.347222	0.182879	0.804401	0.556291	0.908316	0.854885	0.71123	1	0.951389	0.346154	0.948328	0.936709	0.0300752	0	0.974359	0.0645161	0.923729	0.823729	0.972028	0.7375	0.0458453	0.628871	0.904993	0.966912	0
CUP_062	0.323155	0.0704225	0.303797	0.535587	0	0.5	0	0.606061	0.649254	0.627297	0.8125	0.125	0.497778	0.309524	0.958678	0.25641	0.00108932	0.384615	0.0349127	0.764463	0.841863	0.731481	0.527132	0.545455	0.226087	0.371542	0.780488	0.666667	0.624549	0.481707	0.905263	0.846154	0.612903	0.69281	0.526829	0.923077	0.2	0	0.828338	0.0273556	0.643815	0.772	0.873802	0.6	0	0.7727	0.759099	0.25	0.0174672
CUP_063	0.379404	0.357895	0	0.025641	0	0.15894	0.00398406	0.433862	0.743243	0.745763	0.724221	0.2	0.736162	0.586466	0.899408	0	0.219707	0	0.00933489	0.825103	0.945736	0.735986	1	0.171429	0.52356	0.147157	0.843206	0.650538	0.939086	0.817664	0.602067	1	0.584	0.642424	0.824074	1	0.657407	0	0.731085	0.0740741	0.753769	0.895062	0.956679	0.347826	0	0.374625	0.684066	0.8	0
CUP_064	0.0140598	0.26087	0.784232	0.62363	0	0.825397	0.243421	0.81893	0.761364	0.945489	0.846608	0.378947	0.713158	0.777042	0.871795	0.025	0	0.472727	0.00409836	0.80574	0.902542	0.754545	0.984962	0.85	0.886792	0.75	0.836538	0.623529	0.923567	0.848046	0.831488	1	0	0.823105	0.923077	0.796296	0.442105	0.114943	0.808696	0.526699	0.81137	0.820513	0.865979	0.945455	0.280899	0.0572057	0.918429	0.6	0.00462963
CUP_065	0.101562	0	0.312883	0.289982	0	0.814735	0.0189573	0.870892	0.337079	0.932353	0	0.088	0.00917431	0.44	0.731707	0.963265	0.000724638	1	0	0.186667	0.886628	0.788618	0.92	0.68	0	0.716683	0.231726	0.64	0.472081	0.818244	0.874246	1	1	0.780952	0.947458	1	0.456973	0	0.323333	0	0.56229	0.374065	0.600529	0.766355	0.00121803	0.837675	0.859073	0.811881	0.0409091
CUP_066	0.0493601	0	0.833713	0.300991	0	0.453947	0.067086	0.91358	0.409871	0.581015	0.235294	0.0975	0.738585	0.819018	0.815409	0.0181818	0.00062383	0.543478	0	0.594748	0.882305	0.851801	0.779412	0.398305	0.833753	0.436202	0.817308	0.768831	0.873494	0.759857	0.688285	0.913043	0.508696	0.837283	0.790123	0.86087	0.385013	0	0.70936	0.0560246	0.688005	0.71875	0.5525	0.746032	0	0.592042	0.808316	0.630769	0.172886
CUP_067	0.246269	0.5	0.504902	0.638178	0	0.879644	0	0.593427	1	0.881107	0.757895	0.645756	0.581765	0.0078125	1	0.792763	0.00670017	1	0	0.289017	0.96378	0.859155	0.84	0.395349	0.449664	0.773067	0.962963	0.902439	0.397143	0.919017	0.968474	0	1	0.826271	0.984252	1	0.0869565	0	0.778037	0	0.843322	0.901734	0.8	0.440678	0	0.877751	0.851748	1	0.339623
CUP_068	0	0.111111	0.62	0.564838	0	0.666667	0	0.298507	0.385246	0.593407	0.951515	0.131148	0.83	0.279412	0.933333	0	0	0	0	0.558824	0.814332	0.87931	0.4	0	0	0.5	0.987179	0.72	0.5	0.626506	0.944444	0	0.586957	0.333333	0.901961	1	0.666667	0	0.837079	0.272727	0.560748	0.78169	0.375	0.526316	0	0.080402	0.68595	1	0.305085
CUP_069	0.0162602	0.485507	0.618605	0.0675944	0	0.752187	0	0.258065	0.863354	0.940625	1	0	0.885974	0.782787	0.382353	0	0	1	0.0854701	0.623077	0.932203	0.955357	1	0.789474	0	0	0.783505	0.907216	0.771605	0.794239	0.853377	0	1	0.176678	0.4	0.5	0.5	0.0486486	0.883918	0	0.776008	0.333333	0.882022	0.596774	0.0229885	0.53304	0.873633	0.942308	0.0663391
CUP_070	0.891282	0.311321	0.0866426	0.374243	0	0.96789	0.0103093	0.786325	0	0.784091	0.047619	0.666667	0.834686	1	0.909091	0.0666667	0	1	0	0.692833	0.994671	0.954887	0.73301	0	0	0.818182	0.928571	0.824742	0.957143	0.937107	0.858995	1	0.15	0.773438	0.554054	1	0.551402	0	0.862614	0.0275862	0.793814	0	0.72973	0	0.615385	0.9656	0.713604	0.916667	0
CUP_071	0.114286	0.680412	0.827795	0.00205691	0.0177515	0.873776	0.0157553	0.690549	0.980814	0.932996	0.4	0.0428016	0.637703	0.742529	0.890909	0.0666667	0.879663	1	0.00795756	0.9043	0.941462	0.872608	0.84507	0.942982	0.912698	0.568389	0.907317	0.75	0.905769	0.919938	0.83343	0.462963	0.988827	0.680751	0.905825	0.966667	0.608696	0	0.752349	0.310694	0.854301	1	1	0.181818	0.0252366	0.652327	0.962477	0.910526	0.0419948
CUP_072	0.32243	0	0.433333	0.268123	0	0.532895	0	0.981818	0.85743	1	1	0	0.658996	0.376147	0.828829	0	0.0738832	0.906977	0	0.921053	0.946377	0.25	1	1	0.232143	0.607143	1	1	0.903581	0.956204	1	0.465116	0.900383	0.8	1	1	0.555556	0	0.916339	0.197044	0.88403	0.5	0.798658	0.692308	0	0.663017	0.632159	0.382353	0
CUP_073	0.310105	1	1	0.721362	0	0.811518	0.0337838	0.844444	0	0.802817	0	0.357143	0.975417	0	0.915152	1	0	1	0	1	0.916279	1	0.6875	0	0.5	0	0.189873	0.903226	0	0.87931	0.909375	0	0.449275	1	1	1	0.767241	0	0.8125	0	0.883162	1	0	0	0	0.919753	0.821277	1	0.285714
CUP_074	0	0.167785	0	0.0899493	0	0.797834	0	0.844681	0.884135	0.81289	0.0394089	0	0.833622	0.924901	0.981132	0	0	0.368421	0.0135135	0.666667	0.953065	0.655172	0.708861	0.457627	0.862245	0.330882	0.902655	0.654135	0.959064	0.823609	0.995283	1	0.992806	0.728814	0.946746	1	0.587786	0	0.68712	0.289044	0.915543	0.385965	0.976834	0.310345	0.511962	0.131373	0.942537	1	0.0957447
CUP_075	0	0.62585	0.662602	0.584538	0.121711	0.700483	0.00970874	0.782077	0.632893	0.846639	0.0544747	0.264901	0.797247	0.229167	0.847418	0.567376	0.000357654	0.892308	0	0.703611	0.920977	0.786777	0.977401	0.719178	0.526316	0.897638	0.808399	0.5675	0.888889	0.714286	0.879646	1	0.909722	0.573333	0.748441	0.981481	0.711712	0	0.895147	0	0.830831	0.860317	0.901384	0.916667	0	0.604618	0.898676	0.557895	0
CUP_076	0.218182	0.455556	0.649485	0.224638	0	0.566007	0.0251046	0.723077	0.286885	0.595941	0.0206897	0.108108	0.697861	0.727431	1	0	0.000818331	0.875	0.0137174	0.422819	0.95531	0.870192	0.259259	0.858757	0.941296	0.655316	0.973941	0.741935	0.861333	0.920605	0.86119	0.705882	0.681159	0.854031	1	1	0.359551	0	0.564131	0.0461894	0.760432	0.727862	0.779801	0.851064	0.166129	0.65051	0.852005	0.889447	0.230769
CUP_077	0.910272	0.861472	0.445652	0.397619	0.0252525	0.478261	0	1	0.253465	0.687243	0.784	0.177215	0.450902	0.491781	0.679412	0.5	0	0.575758	0.014997	0.25	0.978067	0.948473	0.465517	0.87619	0.133333	0	0.839404	0.898305	0.732929	0.862254	0.0216867	1	0.977612	0.753906	0.938931	0.921788	0.627803	0	0.408289	0.00566038	0.873459	0.929054	0.756856	0.971429	0.00461894	0.607824	0.907635	0.842105	0.020316
CUP_078	0.790834	0.0656168	0.480392	0.774093	0	0.867033	0.0543478	0.846964	0.643192	0.774648	0.018315	0.699482	0.614943	0.454762	0.608309	0.0763359	0.000407498	1	0.0550098	0.723046	0.981278	0.927195	0.924242	0.941176	0.864754	0.734322	0.941176	0.666667	0.791985	0.786078	0.936937	0.714286	0.684211	0.764103	0.858462	1	0.618947	0.0111732	0.909399	0.0203735	0.393723	0.638298	0.672269	0.686567	0.0597015	0.846518	0.860661	0.94	0.661333
CUP_079	0.0208333	0.577143	0.385542	0.00189125	0.023622	0.880282	0	0.652557	0.917226	0.975113	0.0108108	0.0430108	0.634667	0.550336	0.575758	0.358025	0.292317	0.773585	0	0.8357	0.905319	0.535637	0.746269	0.235955	0.714286	0.233766	0.966102	0.722222	0.584946	0.786177	0.904225	0.45	0.675	0.84984	0.977401	0.835821	0.240876	0	0.921445	0.0325203	0.760216	0.90411	0.940678	0.5	0	0.448	0.78024	0.846154	0.0153846
CUP_080	0.040404	0	0.977654	0.450767	0	0.766917	0.00699301	0.848739	0.7173	0.976331	0.930435	0	0.920266	0.675	0.8125	0	0	0.75	0	0.813559	0.975389	0.939655	0.75	1	0	0.641975	0.920863	1	0.387097	0.815789	0.928571	1	1	0.862069	0.961165	0.666667	0.470588	0	0.835671	0.537778	0.667602	0.875648	0.794521	0.7	0	0.699367	0.940898	1	0
CUP_081	0.00340136	0.0612245	0.295455	0.700103	0.0632411	0.748175	0	0.951124	0.930029	0.969444	1	0.586207	0.807517	0.550847	0.413043	0.0517241	0	0.363636	0.77326	0.824532	0.870939	0.854406	0.895062	0.310345	0.717822	0.909871	0.879444	0.794788	0.808989	0.814771	0.827476	1	0.460784	0.788571	0.915789	0.929204	0.455172	0	0.795815	0.00568182	0.22807	0.8125	0.552239	0.823529	0	0.883671	0.857291	0.852174	0.0165746
CUP_082	0	0.822785	0.341935	0.0413669	0	0.535714	0	0.975936	0.920673	0.902439	0.108108	0	0.667638	0.95082	0.755102	0	0.488372	0.5	0.0512821	0.975976	0.978261	0.91358	0.9	0.597561	0.78	0.1	0.75	0.640777	0.77037	0.804104	0.744681	1	0.415094	0.987578	0.992857	1	0.453125	0	0.81384	0.508443	0.80721	0.882979	0.850505	0	0	0.166405	0.872046	0.795918	0
CUP_083	0.0707071	0.833333	1	0.00895255	0	0.613333	0	0.155263	0.931217	0.935484	0.748879	0	0.510823	0.408228	1	0	0.0347777	1	0.0378289	0.67718	0.850185	0.823285	0.716418	0.688889	0.484277	0.752137	0.81982	0.628571	0.820513	0.712477	0.866667	1	1	0.828125	0.722857	0	0.62766	0	0.5689	0.637725	0.942928	0.63354	1	0.548387	0.0681115	0.0363036	0.796488	1	0.0416667
CUP_084	0.458031	0.790614	0.72807	0.000738007	0	0.78629	0	0.906286	0.29927	0.818069	0.743925	0.680769	0.75445	0.940133	0.903195	0.164948	0.0768727	0.626374	0.00909485	0.420206	0.954362	0.817797	0.702804	0.9728	0	0.424967	0.898892	0.872611	0.915751	0.913864	0.704867	0.705314	0.712276	0.93722	0.934572	0.681319	0.587977	0.0528541	0.319341	0.000331895	0.947582	0.946626	0.877645	0.875371	0.00777605	0.789145	0.922588	0.449799	0.00107643
CUP_085	0.586207	0.666667	0.770492	0.302742	0	0.497724	0	0.18412	0.160136	0.798337	0.563934	0	0.771084	0.763804	0.908847	0.044843	0.00681818	1	0.00701754	0.892292	0.968888	0.884058	0.69112	0.946565	0.485714	0.178571	0.998433	0.770795	0.912568	0.835786	0.828463	1	0.954955	0.939358	0.92638	0.950413	0.438017	0	0.757315	0.0117493	0.90055	0.927676	0.8	0.892157	0	0.83011	0.893515	1	0.00191939
CUP_086	0.0564399	0.88	0.645022	0.00173671	0	0.375527	0	0.611684	0.461874	0.915966	0.137778	0.107612	0.485513	0.696629	0.884868	0.14	0	0	0.0486322	0.750397	0.930098	0.996198	0.642857	0.814516	0.461538	0	0.889226	0.793774	0.808081	0.822602	0.386842	0.75	0.172414	0.664407	0.88551	1	0.61039	0.111111	0.646734	0.0526316	0.693585	0.515152	0.871724	0.748092	0	0.309808	0.827212	0.780822	0
CUP_087	0.025641	0.307692	0.0535714	0.0256035	0	0.719388	0.03125	0.907263	0.955696	0.741803	0.037037	0	0.686907	0.444444	0.637037	0.617647	0	0	0.00363636	0.506775	0.918502	0.831715	0.863158	0.457627	0.338028	0.938596	0.939516	0.652174	0.542857	0.811475	0.959911	1	0.345238	0.869081	0.836364	0.860759	0.394958	0	0.659207	0.659224	0.815074	0.872093	0.806452	0.777778	0	0.845411	0.882629	0.767442	0.270588
CUP_088	0.0788863	0.301115	0.45098	0.396626	0.12069	0.638498	0	0.27027	1	0.950331	0.0186567	0.55102	0.741525	0.664516	0.966547	0	0.038055	0	0	0.70235	0.907801	0.705285	0.880597	0.649635	0.929487	0.236111	0.700214	0.317343	0.957895	0.970121	0.8975	0.0909091	0	0.857877	0.979294	0.911111	0.2	0	0.850166	0	0.865031	0.957377	0.997899	0.757143	0.120253	0.836134	0.720652	1	0.00200401
CUP_089	0.133333	0.489247	0.8	0.00744786	0	0.570707	0.0816327	0.794304	0.897629	0.310508	0.109557	0	0.754286	0.250923	0.88	0.0322581	0.0107599	0.636364	0	0.747312	0.948666	0.938575	0.593023	0.88	0.731092	0.319588	0.859539	0.76506	0.964602	0.821974	0.770492	0.824561	0.506993	0.885081	0.845209	0.854839	0	0.0681818	0.830986	0.170325	0.910788	0.842105	0.856481	1	0	0.422575	0.828933	0.836879	0.184211
CUP_090	0	1	0.524691	0.859513	0	0.513228	0	0.555556	0.774648	0.928571	0	0	0.753709	0.169811	0.859155	0.0731707	0	0	0.0042735	0.947699	0.929348	0.145299	1	0.148148	0.285714	1	0	0.360902	0.45	0.902778	0.918239	1	0.954955	0.894958	0.978495	0.852459	0.136364	0	0.692521	0	0.88806	0.976744	1	0.857143	0	0.920534	0.782583	0.666667	0.720137
CUP_091	0	0	0.366013	0.018746	0	0.817391	0.139423	0.939324	0.810945	0.923729	0.678201	0.285714	0.901687	0.484277	0.961326	0	0.1	0.8	0	0.869565	0.992908	1	0.92	0.931034	0.617347	0.875	0.814978	0.739884	0.97878	0.937255	0.923596	1	0.669811	0.917313	0.873016	1	0.730263	0	0.630102	0.351275	0.667162	0.734007	1	1	0.634703	0.056	0.965374	0.675	0
CUP_092	0.022831	0.473988	0.288889	0.0567067	0	0.923077	0	0	0.719844	0.954802	0.0159574	0.0465116	0.838095	0.23494	1	0	0.0452756	0	0.00935551	0.573333	0.91675	0.853392	0.657895	0.826087	1	0.743243	0.736842	0.928571	0.739535	0.694048	0.926752	1	0.964912	0.683594	0.859155	0.885714	0.147959	0.00813008	0.808219	0	0.880911	0.685185	0.773196	0.5	0	0.59292	0.921899	0.5	0
CUP_093	0	0.636364	0.797101	0.672703	0	0.79292	0.0153846	0.813051	0.22093	0.933775	0	0.2	0.905521	0.544601	0.795181	0	0.0664018	0.285714	0.0192308	0.800333	0.970447	0.853723	0.933333	0.290323	0.202381	0.870922	0.167331	0.704225	0.550562	0.823446	0.793651	1	0.831776	0.7851	0.91342	0.8	0.274336	0.0289017	0.919924	0.0479705	0.867207	0.966667	0.788707	0.428571	0	0.915026	0.677734	0.933333	0.0490566
CUP_094	0.0264317	0.917051	0.460938	0.167024	0	0.821092	0	1	0.666667	1	0	0.29646	0.866769	0	1	0	0	0.877551	0	0.982323	0.926786	0.47482	0.747253	1	0.555556	0.55	0	0.887324	0.954693	0.872414	0.474946	1	0.276119	0.2	1	1	0.175	0	1	0	0.843254	0.893382	0.436893	0.866667	0	0.86144	0.710317	0.928571	0
CUP_095	0.00934579	0.399015	0.175439	0.0154772	0	0.766904	0	0.930736	0.311856	0.899408	0.0965732	0.0344828	0.764298	0.367257	0.909091	0.129032	0.543478	0	0.0137741	0.989501	0.959197	0.73301	0.952381	0.0512821	0.534247	0.642857	0.851724	0.637931	0.777778	0.735876	0.666667	0.225806	0.285714	0.792829	0.815789	0.647059	0.222222	0.0686275	0.816602	0	0.914634	0.928571	0.92378	0	0.105263	0.40949	0.765986	0.992126	0
CUP_096	0.0638298	0.705882	0.90566	0.940269	0	0.806122	0	0.901469	0.844327	0.881533	0	0.0515464	0.868957	0.947559	0.538462	0	0	0.8	0	0.920672	0.940594	0.452632	1	0.945946	0.324675	0.869318	0.239726	0.526316	0.986971	0.849315	0.8125	1	0.708738	0.635417	0.971787	0.981651	0.02	0.0517241	0.745115	0.00246914	0.911538	0.908745	0.895238	0	0	0.879985	0.925059	0.90411	0
CUP_097	0.535211	0	0.594595	0.572748	0	0.843299	0.0284091	0	0.836257	0.735294	0.135135	0.47561	0.69278	0.54955	0.723164	0.2	0.0194752	0	0	0.649254	0.89314	0.866359	0.793103	0.72093	0.538462	0.857923	0.8	0.934579	0.906367	0.847896	0.902256	0.809524	1	0.649485	0.837209	1	0.535484	0	0.648045	0	0.845745	0.901639	1	0.923077	0	0.806173	0.681232	0.840909	0.603604
CUP_098	0.115702	0.562963	0.5625	0.533408	0	0.693333	0.0140845	0.602837	0.161458	0.865801	0.830508	0.65	0.903091	0.483871	0.705202	0	0.0254237	0.25	0.826436	0.661765	0.928921	0.941915	0.957746	0.93617	0.189655	0.268421	0.834667	0.636364	0.72119	0.838532	0.916442	0.692308	0.837209	0.771574	0.839572	0.952381	0.508876	0	0.835476	0.0408163	0.365	0.987654	0.803279	0.852941	0	0.113284	0.880044	0.555556	0.0693642
CUP_099	0.447619	0.5	0.412322	0.447795	0	0.826923	0	0.626781	0.964758	0.953368	0.723333	0.384615	0.881406	0.512605	0.833333	0	0.0445151	0.6	0	0.775076	0.989011	0.875362	0.737705	1	0.666667	0.747573	0.764706	0.523438	0.967123	0.997658	0.892925	1	0.827893	0.276923	0.893939	0.893805	0.32	0	0.82	0	0.863636	0.796438	1	1	0	0.77101	0.854215	1	0.251462
CUP_100	0.0530726	0.857143	0.691824	0.603682	0	0.872611	0.673469	0.84918	1	0.917526	0.047619	0.0344828	0.821326	0.882736	1	0.337838	0.0756579	0.727273	0.766667	0.721366	0.976316	0.972737	0.918919	0.646341	0.769811	0.371429	0.940199	0.712	0.95102	0.883721	0.978208	1	0.946875	0.772532	0.919463	0.944444	0.230453	0.0909091	0.97025	0.0654762	0.925592	0.90137	0.921788	0.6	0	0.314128	0.841172	0.892857	0.222222
CUP_101	0.6	0	0.462687	0.641719	0.121951	0.64564	0.0915493	0.704819	0.734266	0.971831	0	0	0.760542	0.715736	0.637427	0.155039	0.0135222	0.02	0	0.624113	0.881266	0.629283	0.756881	0.606742	0.965517	0.220225	0.858586	0.554217	0.903226	0.887147	0.748077	0.4	0.333333	0.955128	0.859375	1	0.369565	0	0.735192	0	0.872227	0.692308	0.827586	0.425532	0.00641026	0.498079	0.879001	0.909091	0.780335
CUP_102	0.832787	0.0779221	0.653333	0.604801	0	0.724409	0.0262009	0.771242	0.978261	0.804954	0.186207	0	0.917819	0.478632	0.971014	0.126582	0.000555864	0	0	0.690323	0.971285	0.916905	1	0.714286	0.453333	0.958932	0.839286	0.855856	0.92029	0.844063	0.887487	0.75	1	0.809353	0.90378	0.966102	0.347518	0	0.90011	0.00367647	0.895197	0.933045	0.956522	0.815789	0.0298507	0.898691	0.872672	0.861111	0.581395
CUP_103	0.373057	0.901408	0.733333	0.327563	0	0.589899	0	0.427273	0.879121	0.933775	0	0.165	0.93266	0.552632	1	0.166667	0	0.272727	0.0351562	0.837302	0.973271	0.89759	0.5	0.819767	0.915663	0.874016	1	0.872093	0.97561	0.933002	0.902375	0.512195	0.716667	0.827586	0.986547	0.666667	0.493151	0	0.867841	0.147541	0.89798	0.750515	0.953642	0.65625	0	0.833016	0.912104	1	0.72
CUP_104	0.0514563	0.382716	0.916256	0.725467	0	0.708738	0	0.705851	0	1	0.05	0.0781759	0.848584	0.240331	0.892593	0.625	0.0211039	0.794393	0	0.610526	0.982451	0.853165	0.904412	0.927273	0	0.826087	0.883008	0.680052	0.16129	0.839567	0.976714	0.32	0.998016	0.780488	0.81	0.88172	0.692308	0	0.552174	0	0.870801	0.930748	0.852321	0.904762	0	0.959566	0.806172	0.722222	0.665971
CUP_105	0.0712946	0.107143	0.864078	0.000928505	0	0.375375	0	0.855769	0.930864	0.747748	0.0609319	0	0.480392	0.0516432	0.795455	0.105769	0	0.625	0.0172563	0.522505	0.939578	0.86755	0.7	0.892473	0.675676	0.0597826	0.859477	0.46875	0.845697	0.684492	0.808581	0.777778	0.62212	0.663507	0.897561	0.90678	0.325581	0	0.820874	0.159821	0.654957	0.103226	0.52	0.885714	0.334405	0.128483	0.913589	0.733333	0
CUP_106	0.0528846	0.730496	0.7	0.394432	0	0.628676	0	0.231707	0.930636	0.446494	0.108108	0	0.884131	0.735294	0.753488	0	0.118182	1	0	0.811388	0.970254	0.376	1	0	1	0.879747	1	0.692308	0.865854	0.853333	0.786765	1	1	0.835125	0.992832	1	0.333333	0.0789474	0.920455	0.0137363	0.931748	0.873016	0.991837	1	0	0.0806011	0.758285	0.533333	0
CUP_107	0.0230769	0.677419	0.183673	0.0220183	0	0.445312	0	0.812865	0.66998	1	0.428571	0.326203	0.774536	0.486842	0.530769	0.370787	0.743243	0.378378	0.0037594	0.797619	0.912309	0.863636	0.961039	0.517857	0.151786	0.743772	0.731092	0.445205	0.969697	0.711066	0.726457	0.166667	0.57377	0.763636	0.883333	0.918367	0.128205	0	0.862097	0.00961539	0.884811	0.661616	0.828704	0.333333	0	0.492147	0.721058	0.944444	0
CUP_108	0	0.859459	0.52439	0.15119	0	0.893196	0.00448431	0.358696	0.902098	0.861566	0	0	0.803815	0.461905	0.891228	0.567347	0	0.407407	0	0.821147	0.91137	0.69258	0.925234	0.0769231	0.886364	0.857616	0.87988	0.123418	0.810939	0.774755	0.976667	0.92	0.984649	0.896254	0.968531	0.821918	0.0530973	0	0.868217	0.0779754	0.96099	0.858537	0.982659	0.1	0	0.0643902	0.446508	0.884892	0
CUP_109	0	0.2	0.276596	0.0332188	0.227273	0.98374	0.0357143	0.0424528	1	0.95	0.142857	0	0.936306	0.833333	0.674473	0.0444444	0	1	0	1	0.959783	0.803279	0.867647	0.6	0.131579	0.754386	1	0.703125	0.809524	0.799505	1	0	0.843602	0.762376	1	0.955556	0.15625	0	0.708257	0.0681818	0.60241	0.808	0	0.764706	0.0588235	0.0973451	0.5	0.962963	0
CUP_110	0	0.95	0.526667	0.235842	0	0.780731	0.0120482	0.592375	0.955844	0.875519	0	0.037037	0.9	0.824324	0.734463	0	0.0169697	0.727273	0	0.822296	0.970078	0.461538	0.892473	0.540541	0.0508475	0.978723	0.935065	0.364929	0.917733	0.840237	0.885167	0.969697	0.910256	0.796512	0.978125	0.962963	0	0	0.884887	0.0157895	0.837101	0.780549	0.963731	0.69697	0.0178571	0.116325	0.22307	0.903409	0
CUP_111	0	0.464789	0.05	0.164835	0	0.659794	0	0.956044	0.97973	0.882353	0	0	0.917738	0.851852	0.745455	0.0952381	0.00579151	0.333333	0	0.912162	0.920844	0.923077	0.836735	0.5	1	0.753521	0.992366	0.8	0.871795	0.774436	0.91875	1	0.96	0.735294	0.986842	0.4375	0.425532	0	0.97201	0.0595238	0.325301	0.919355	0.206897	0.666667	0	0.255754	0.869697	0.75	0
CUPS_C1	0.00920502	0.917857	0.896783	0.713286	0.0311321	0.923495	0.00246508	0.950786	0.472015	0.968481	0.0246821	0.151685	0.951429	0.649378	0.898	0.847581	0.00834381	0.894608	0.00665591	0.765557	0.97496	0.932488	0.916168	0.908497	0.279756	0.784249	0.976211	0.848266	0.577398	0.848084	0.91735	1	0.745798	0.907438	0.964147	0.942408	0.351648	0.0251656	0.874217	0.0404363	0.944124	0.972711	0.848796	0.822086	0.00511771	0.798235	0.944205	0.977099	0.0253304
CUPS_C10	0.696721	0.263158	0.978261	0.502551	0.0540541	0.90991	0.161616	0.900815	0.923913	0.833333	0.897297	0.510638	0.925234	0.952381	0.75	0	0.00898876	0.944954	0	0.686016	0.966216	0.942675	0.923077	1	0.731343	0.75	0.938776	0.914286	0.95915	0.917582	0.945205	1	0.8	0.9125	1	1	0.551724	0.692308	0.847733	0.232323	0.874142	0.941176	0.809524	0.923077	0	0.856481	0.933185	1	1
CUPS_C11	0.00817096	0.0422764	0.576271	0.271293	0.00211864	0.937795	0.0109677	0.946247	0.598093	0.926552	0.817977	0.345656	0.942772	0.0284192	0.894831	0.0779221	0.00471799	0.850746	0.00302697	0.192201	0.957453	0.954094	0.683794	0.915556	0.20354	0.698042	0.943867	0.93621	0.0437247	0.919561	0.928684	0.874564	0.960069	0.924621	0.948419	0.971867	0.458223	0.00882613	0.436613	0.0152231	0.949955	0.678333	0.684676	0.928962	0.00518135	0.918827	0.939823	0.970588	0.542025
CUPS_C12	0.0743802	0.313253	0.841432	0.0498084	0	0.788321	0	0.915882	0.959064	0.896552	0	0	0.91353	0.760234	0.809859	0.115385	0.00560224	0.884615	0	0.753002	0.942774	0.948413	0.88	0.764706	0.974359	0.411765	0.965517	0.608187	0.950685	0.859944	0.885135	0.611111	0.741007	0.867089	0.972028	0.896552	0.435115	0	0.687332	0.0578231	0.91866	0.926145	0.852564	1	0.302326	0.640426	0.889381	0.972222	0.580952
CUPS_C13	0.329402	0.67042	0.819765	0.369679	0.0132312	0.882827	0.00779102	0.938335	0.36852	0.884704	0.65064	0.568786	0.87419	0.924287	0.890204	0.030445	0.00189602	0.831325	0.00905797	0.689013	0.958882	0.938824	0.471526	0.861472	0.383013	0.412345	0.964555	0.780086	0.917355	0.843685	0.904462	0.938144	0.864572	0.863062	0.945867	0.895492	0.462154	0.00187266	0.893963	0.629856	0.750087	0.772253	0.726293	0.843284	0	0.070343	0.94257	0.938343	0.00110906
CUPS_C14	0.49537	0.382166	0.859843	0.218589	0.263736	0.670455	0.175159	0.926797	0.9775	0.934783	0.873351	0.313725	0.910237	0.963325	0.895973	0.3	0.317335	0.841797	0.758051	0.792957	0.96691	0.944293	0.764706	0.862069	0.875445	0.407692	0.9163	0.643098	0.96304	0.945619	0.950739	1	0.762228	0.946731	0.943548	0.942373	0.594937	0.0394737	0.881946	0.578686	0.956965	0.929651	0.970588	0.914894	0.132075	0.608988	0.922199	0.831858	0.337209
CUPS_C15	0.0606061	0.596491	0.87172	0.129758	0.168224	0.65625	0	0.924171	0.933036	0.963934	0.0597015	0.232394	0.910506	0.935065	0.951456	0.025	0.106576	0.845238	0.176638	0.784257	0.981386	0.93617	0.85	0.9	0.764706	0.571429	0.936709	0.887755	0.895631	0.839378	0.936842	0.928571	0.85654	0.802956	0.974684	0.888889	0.236842	0.0277778	0.884363	0.0833333	0.929336	0.957295	0.757962	0.813559	0.164286	0.363636	0.954291	0.986486	0.404762
CUPS_C16	0.0614754	0.277778	0.610248	0.206827	0.141089	0.893827	0.228137	0.921661	0.507853	0.95941	0.870968	0.324415	0.969461	0.579158	0.948571	0.186992	0.119403	0.938931	0.217742	0.352239	0.971203	0.962225	0.529412	1	0.495627	0.29646	0.947619	0.940816	0.617597	0.890585	0.92955	0.953488	0.95229	0.866071	0.932749	0.993151	0.523364	0	0.490661	0.156613	0.93788	0.961637	0.275316	0.931507	0.0169492	0.748857	0.936893	0.987342	0.0387097
CUPS_C17	0.0531401	0.0601093	0.816138	0.460867	0.134921	0.935946	0.184524	0.937407	0.459948	0.948913	0.511945	0.0592593	0.949326	0.154145	0.753788	0.314667	0.0669014	0.815407	0.222693	0.255074	0.959148	0.969314	0.326923	0.953125	0.28125	0.099631	0.962441	0.95068	0.445107	0.930314	0.830846	0.657895	0.966909	0.726465	0.97733	0.865116	0.167785	0.298507	0.527027	0.0921986	0.903938	0.770066	0.640625	0.853659	0.0837989	0.959063	0.863089	0.782353	0.2375
CUPS_C18	0.29697	0.424242	0.907692	0.161198	0.107784	0.70068	0.66087	0.928894	0.833333	0.877698	0.0625	0.0446429	0.847727	0.929878	0.868852	0.413793	0.102459	0.725118	0.675752	0.722983	0.963682	0.981618	0.952381	0.75	0.890909	0.737226	0.986667	0.97619	0.917614	0.86383	0.878505	0.764706	0.376518	0.973333	0.532663	0.7	0.758621	0	0.729167	0.19802	0.906712	0.804281	0.985294	1	0.253846	0.130354	0.943436	1	0.092827
CUPS_C19	0.426652	0.555556	0.895141	0.526123	0.0390805	0.840077	0	0.912284	0.863884	0.937371	0	0.210247	0.895547	0.927092	0.961538	0	0.0117763	0.914894	0.263723	0.790485	0.97395	0.973413	0.907407	0.91791	0.871935	0.417695	0.997085	0.939959	0.946192	0.914989	0.956026	0.95	0.904128	0.896447	0.954984	0.987097	0.596215	0	0.939851	0.0312925	0.835302	0.940248	0.784062	1	0	0.864792	0.956182	0.94958	0.63245
CUPS_C2	0.944518	0.837139	0.945912	0.796374	0.304	0.960396	0	0.945459	0.944837	0.982103	0.979233	0.745955	0.961667	0.988342	0.952456	0.0517241	0.0751116	0.939954	0.495108	0.919189	0.962204	0.97933	0.99187	1	0.793233	0.766067	0.926829	0.870466	0.933401	0.936258	0.996188	1	0.952381	0.924431	0.953271	1	0.683333	0.375	0.852941	0.110059	0.946706	0.984921	0.977778	1	0.0365448	0.954398	0.947626	0.973154	0.838264
CUPS_C20	0.0813648	0.812227	0.989141	0.0201746	0.551351	0.935528	0	0.958478	0.983713	0.988455	0	0.0927467	0.940531	0.928185	0.99403	0.0555556	0.625952	0.492754	0	0.908094	0.974006	0.958498	0.947368	0.836538	0.632812	0.662963	0.911839	0.955684	0.93255	0.926033	0.971545	0.529412	0.835979	0.81157	1	1	0.681633	0	0.951298	0.428699	0.860315	0.962704	0.994334	0	0.437811	0.655325	0.943904	0.747368	0
CUPS_C21	0.374074	0.563275	0.969987	0.209436	0.157248	0.883641	0.003663	0.94635	0.196133	0.941687	0.787352	0.218667	0.943671	0.962818	0.97099	0.344	0.0738636	0.94898	0.091029	0.331023	0.97798	0.943066	0.865079	0.942982	0.405882	0.465368	0.903967	0.939227	0.97313	0.943935	0.865823	1	0.956155	0.872117	0.994624	0.957661	0.424825	0.0740741	0.788485	0.398734	0.940162	0.905793	0.718033	0.86747	0.013245	0.124544	0.950511	0.980645	0.0806452
CUPS_C22	0.0219178	0.5	0.915809	0.410039	0	0.778571	0	0.935787	0.913858	0.913539	0.860627	0.289784	0.843858	0.80422	0.911433	0.347059	0.085976	0.892638	0.0117878	0.688969	0.983692	0.978799	0.768421	0.976744	0.776549	0.195041	0.989796	0.701053	0.924906	0.879386	0.845872	0.926829	0.804348	0.898175	0.967949	0.909091	0.479167	0.00813008	0.805188	0.0353063	0.903666	0.883415	0.849727	0.947826	0.234927	0.745012	0.940706	1	0.188679
CUPS_C23	0.672996	0.654762	0.836364	0.412861	0.690945	0.819714	0.00512821	0.955378	0.563291	0.839793	0.895216	0.460674	0.735657	0.926523	0.809783	0.2	0.0267442	0.734177	0.709677	0.551361	0.91036	0.99278	0.666667	0.764706	0.223404	0.596154	0.870813	0.645833	0.928646	0.891709	0.95375	1	0.257802	0.76	0.911765	1	0.482759	0.0241546	0.85887	0.282322	0.936639	0.896723	0.907162	0.839286	0.0369004	0.885523	0.896013	0.960317	0.157895
CUPS_C24	0.79021	0.833333	0.924658	0.780731	0.111111	0.877778	0.463415	0.943983	0.975	0.94697	0.897196	0.827869	0.960619	0.972727	0.957746	0.0714286	0.159851	0.854545	0.965421	0.937063	0.981083	0.98503	0.9375	0.882353	0.931818	0.79	1	0.916667	0.953878	0.935829	0.98	0.941176	0.831579	0.962264	0.95082	0.95122	0.777778	0	0.905746	0.857143	0.977236	0.974419	0.95	0.909091	0	0.903785	0.983657	1	0.936508
CUPS_C25	0.367412	0.566845	0.911631	0.151404	0.0138889	0.60373	0.00892857	0.961172	0.956859	0.97561	0.870998	0.248292	0.916017	0.942603	0.84106	0.280172	0.0173735	0.885993	0.167959	0.816104	0.96952	0.954276	0.917582	0.767068	0.841981	0.479193	1	0.742248	0.87847	0.916353	0.942228	0.69863	0.778169	0.912766	0.913333	0.910638	0.251748	0.0070922	0.917579	0.433659	0.863326	0.941259	0.931613	0.78125	0.0408163	0.408738	0.92038	0.94332	0.32906
CUPS_C26	0.175	0.78169	0.877034	0.0560748	0.0333333	0.940758	0	0.971658	0.78125	0.967105	0.222222	0.0128205	0.931496	0.824818	0.719512	0	0.0634328	0.946927	0.0522088	0.502607	0.98016	0.93617	0.909091	0.727273	0.935484	0.69509	1	0.889908	0.546569	0.868914	0.963636	1	0.921053	0.469697	0.862385	0.892308	0.208333	0.392857	0.899785	0.0208333	0.910465	0.960239	0.896825	1	0.016129	0.911223	0.888889	1	0
CUPS_C27	0.702936	0.885714	0.977248	0.880024	0.108434	0.915842	0.0140845	0.945842	0.823219	0.971212	0.962542	0.62069	0.952232	0.638743	0.991781	0.0849057	0.0588235	0.945565	0.310727	0.838646	0.980996	0.973214	0.787879	1	0.35443	0.35545	0.990909	0.94896	0.956664	0.957704	0.957386	1	0.581599	0.872995	0.919643	0.961832	0.742991	0.121212	0.912086	0.0929648	0.898787	0.961255	0.82808	1	0.34058	0.460674	0.975899	1	0.440111
CUPS_C28	0.00853789	0.879292	0.932439	0.58923	0	0.861331	0.00638686	0.927609	0.918486	0.838857	0.00213904	0.0295405	0.934932	0.958661	0.691596	0.00842697	0.00486618	0.884494	0.00397036	0.858672	0.96077	0.858669	0.971963	0.686217	0.0866808	0.556358	0.152369	0.855607	0.948614	0.773585	0.725036	0.851852	0.858586	0.263066	0.939925	0.966361	0.292169	0.0451866	0.880262	0.00511566	0.832743	0.914303	0.944095	0.554348	0	0.766391	0.724418	0.978659	0.0198498
CUPS_C29	0	0.6	1	0.0232558	0	0.785124	0.888889	0.963788	0.977215	0.975845	0.507599	0	0.773852	0.907781	0.966667	0.595745	0.0790068	0	0.00245098	0.88535	0.969217	0.961821	0.972973	1	0.960784	0.699164	1	0.90625	0.99422	0.905615	0.946128	1	0.8	0.898406	1	1	0.75	0.375	0.875112	0.0631579	0.843206	0.92233	0.789474	1	0.294118	0.492611	0.95458	1	0.455959
CUPS_C3	0.201031	0.491429	0.965991	0.0341023	0.0535714	0.786358	0.19403	0.900245	0.935223	0.942857	0.663391	0.10828	0.933314	0.956857	0.94	0.260417	0.0239868	0.862445	0.365405	0.846506	0.971868	0.906897	0.880435	1	0.910798	0.637821	0.844523	0.876543	0.866539	0.926335	0.959184	1	0.709924	0.901818	0.955556	0.919668	0.827815	0.25	0.849963	0.360619	0.935345	0.933891	0.965174	0.762712	0	0.662599	0.918583	1	0
CUPS_C30	0.383803	0.685567	0.882701	0.0140772	0.0840336	0.790588	0	0.955253	0.984906	0.97201	0.847303	0.166667	0.913964	0.911859	0.807692	0.514286	0.893638	0.695652	0.339806	0.857597	0.965529	0.973761	0.75	1	0.826087	0.832335	1	0.858824	0.966635	0.977679	0.898113	0.769231	0.925651	0.942373	0.989637	0.994975	0.402985	0.833333	0.9114	0.456081	0.95881	0.946479	0.726562	0.705882	0.0406977	0.707703	0.959609	0.973333	0
CUPS_C31	0.59887	0.836257	0.945643	0.644734	0.04	0.813312	0	0.919715	0.892625	0.951961	0.967033	0.590032	0.910035	0.954225	0.872694	0.141304	0.1875	1	0	0.833333	0.98341	0.943162	0.971963	0.95977	0.700483	0.480565	0.965714	0.805112	0.960613	0.851133	0.970451	1	0.879177	0.963572	0.997396	0.944099	0.521246	0	0.905667	0.33704	0.721275	0.925119	0.604336	0.761905	0.0583658	0.036635	0.951199	0.815789	0.0693069
CUPS_C32	0.037037	0.0487805	0.899614	0.507353	0.323232	0.936893	0	0.951708	0	0.943723	0.731183	0.122449	0.921552	0.209524	0.918033	0	0.0623145	0.914894	0.329412	0.247036	0.961111	0.978947	0.178571	0.948718	0.422414	0.283333	0.939759	0.946809	0.833977	0.987805	0.920354	0	0.935733	0.871287	1	0.914894	0.285714	0	0.334545	0.046875	0.929204	0.849099	0.345794	0.9	0	0.947883	0.911514	0.96875	0.127273
CUPS_C33	0.15873	0.767442	0.905473	0.325879	0	0.808612	0	0.916155	0.56044	0.899408	0.797508	0.285714	0.858369	0.930481	0.902778	0.827586	0.0416667	0.87037	0	0.560976	0.970149	0.974074	0.357143	0.90625	0.666667	0.436782	0.95122	0.95082	0.983029	0.928571	0.910891	1	0.818493	0.953704	1	0.980392	0.536585	0	0.738636	0.0923913	0.9408	0.835294	0.927273	1	0.0655738	0.86201	0.941548	1	0
CUPS_C34	0	0.24	0.893617	0.0250417	0	0.236111	0.031746	0.895652	0.936842	0.947368	0	0.225806	0.928859	0.965217	0.862069	0.166667	0.00507614	0.834951	0.0168067	0.76875	0.978315	0.972603	0.866667	1	0.928571	0.0941176	1	0.888889	0.943548	0.963134	0.803681	1	0.888199	0.94964	0.84	0.961538	0.142857	0.142857	0.849103	0.224359	0.953964	0.944444	0.880435	1	0	0.381471	0.967066	0.869565	0
CUPS_C35	0.739286	0.226115	0.940707	0.597445	0.110403	0.905367	0.180412	0.950345	0.948824	0.957131	0.84	0.53867	0.899103	0.964951	0.887283	0.0714286	0.0509363	0.875	0.0357143	0.83289	0.945155	0.967664	0.888889	0.806452	0.656357	0.655446	0.917431	0.834532	0.910523	0.915598	0.921635	0.830986	0.732265	0.838875	0.928736	0.950673	0.526971	0.0645161	0.818194	0.292176	0.756757	0.932237	0.870301	0.782609	0.0153061	0.885741	0.918047	1	0.650206
CUPS_C36	0.130719	0.378007	0.862013	0.00890328	0	0.76834	0	0.827353	0.950089	0.962536	0.426009	0.0660661	0.884211	0.873288	0.909091	0.0273973	0.00117647	0.823529	0.00143062	0.776612	0.96111	0.967851	0.92	0.930233	0.98494	0.137525	0.962406	0.852518	0.840749	0.899179	0.996241	0.960784	0.879852	0.906287	0.997653	1	0.210526	0	0.903196	0.0397506	0.893491	0.904953	0.964413	1	0.0676056	0.16317	0.927521	0.955882	0
CUPS_C37	0.0204082	0.73315	0.986425	0.0221943	0	0.867704	0.0208333	0.959391	0.967563	0.916402	0	0.176835	0.922652	0.810811	0.827485	0.0320513	0	0.956044	0	0.663931	0.979344	0.973535	0.907692	0.257812	0.722222	0.496907	0.190031	0.308311	0.955357	0.943745	0.91768	0.972973	0.480263	0.442308	0.937622	0.984375	0.0232558	0	0.941413	0.0626168	0.935338	0.927928	0.908046	1	0	0.488114	0.966102	0.848168	0.0217391
CUPS_C38	0.147018	0.428571	0.984346	0.0271985	0.118243	0.850277	0	0.971806	0.978754	0.985507	0.12093	0.167992	0.911032	0.911602	0.827853	0.320175	0.587365	0.685921	0.220307	0.823065	0.960794	0.984262	0.709402	0.65035	0.371981	0.807874	0.969751	0.905618	0.903201	0.85782	0.981481	0.5375	0.747368	0.892061	0.989565	0.965517	0.0677083	0	0.914329	0.071467	0.900558	0.960688	0.972431	0	0	0.48626	0.893697	1	0.175153
CUPS_C39	0.94614	0.40566	0.916667	0.901519	0.108333	0.915423	0.0123457	0.945462	0.958549	0.985948	0.901079	0.822222	0.927868	0.959781	0.90303	0.28	0.0291457	0.935561	0.0714286	0.928786	0.967087	0.971429	0.882353	0.825397	0.770701	0.776224	0.954839	0.911765	0.917891	0.900744	0.977612	0.8	0.742604	0.911215	0.9375	0.986395	0.705882	0.0416667	0.841866	0.0791557	0.791304	0.931701	0.869347	0.818182	0.04	0.926166	0.935666	0.947368	0.749129
CUPS_C4	0.201493	0.976852	0.936709	0.120267	0.440559	0.979508	0	0.763423	0.253012	0.934028	0.0266667	0.0135747	0.81713	0.688022	0.923913	0.322581	0.0162095	0.315	0.073913	0.851117	0.985521	0.819277	0.5	0.988372	0.522727	0.833333	0.871111	0.835052	0.613941	0.892009	0.965957	1	0.822394	0.836	0.9625	1	0.407407	0.0175439	0.899281	0.202273	0.965003	0.9801	0.974874	0.230769	0.166667	0.897555	0.83913	0.362069	0.14966
CUPS_C40	0.366492	0.224189	0.965517	0.417844	0.265748	0.859043	0	0.949452	0.936721	0.969436	0.946859	0.460993	0.894737	0.941489	0.863422	0.0142857	0.00312989	0.877119	0.00381679	0.77429	0.980035	0.949222	0.955696	0.901235	0.71131	0.421543	0.985632	0.86262	0.924097	0.926689	0.923562	0.984848	0.884106	0.825203	0.987654	1	0.400641	0.0131579	0.928692	0.0553633	0.94	0.928072	0.900807	0.953846	0.0352941	0.575512	0.934457	0.935606	0.364606
CUPS_C41	0.0187538	0.768904	0.924242	0.178313	0.0121342	0.906532	0.00200938	0.840842	0.925802	0.937435	0.00399202	0.025974	0.939265	0.944107	0.726817	0.0153846	0.00335926	0.401392	0.00379987	0.789651	0.965935	0.957786	0.971875	0.375	0.548483	0.666667	0.760171	0.783166	0.567209	0.889702	0.887875	0.943662	0.518862	0.865552	0.958893	0.948387	0.0991379	0.00171527	0.923543	0.0147916	0.901837	0.965707	0.967458	0.393939	0.000914913	0.628666	0.811725	0.280083	0.0138889
CUPS_C42	0.101562	0.796992	0.94695	0.698795	0	0.85	0.0102041	0.96114	0.854545	0.920103	0.939873	0.611111	0.952849	0.627907	0.931034	0.903614	0.197109	0.854271	0.227692	0.801463	0.963066	0.93913	1	0.825	0.311005	0.708333	0.91453	0.721519	0.837209	0.86875	0.985149	0.875	0.826923	0.884146	0.972696	0.92126	0.5	0.789474	0.826061	0.29703	0.910788	0.940217	0.913978	0.866667	0.0625	0.833333	0.949281	1	0.214815
CUPS_C43	0.106383	0.802083	0.783333	0.0445387	0.307087	0.732394	0	0.95433	0.684685	0.910233	0	0.218447	0.883984	0.355987	0.927885	0.419355	0.116832	0.95189	0.150943	0.74938	0.984806	0.968974	0.642857	0.411765	0.299213	0.284091	1	0.929293	0.556355	0.958848	0.979798	0.941176	0.582677	0.939759	1	0.98374	0.191781	0	0.757576	0.0904872	0.93073	0.928082	0.948276	1	0.0333333	0.945731	0.97437	0.95	0.0535714
CUPS_C44	0.0140845	0.878505	0.864564	0.10819	0.411111	0.963415	0.831897	0.950495	0.972477	0.850416	0.348178	0.0684932	0.889683	0.968037	0.957317	0	0.0226481	0.976744	0.647754	0.86277	0.988267	0.991919	0.09375	0.77551	0.883162	0.938462	0.938272	0.942308	0.967223	0.915289	0.970976	1	0.463054	0.97027	0.97561	0.878505	0.919643	0.1	0.792995	0.166667	0.936875	0.906977	0.946237	0.96875	0.646707	0.09375	0.965363	1	0.25641
CUPS_C45	0.17757	0.413793	0.72963	0.0538462	0.0337079	0.536232	0.031746	0.757384	1	0.920904	0.770492	0.131579	0.917969	0.941558	0.878505	0	0.0051458	0.852273	0.0322581	0.794549	0.965167	0.958763	0.705882	0.833333	0.625	0.239437	0.888889	0.810811	0.95539	0.965217	0.804688	1	0.961722	0.795918	0.852459	0.931507	0.125	0	0.880822	0.103704	0.910377	0.924092	1	1	0	0.481959	0.89414	0.959184	0.0212766
CUPS_C46	0.119318	0.686567	0.944444	0.0359066	0	0.892377	0.566667	0.949346	0.938326	0.70229	0.0125	0.0344828	0.832656	0.943284	0.891026	0.25	0.0220408	0.828358	0	0.528588	0.973951	0.948148	0.8	1	0.877778	0.59375	1	0.581967	0.930206	0.88535	0.952941	0.75	0.555556	0.885906	0.960526	0.684211	0.214286	0.0909091	0.781003	0.163102	0.86696	0.816156	0.904762	1	0.539062	0.471264	0.958603	0.985915	0.0272109
CUPS_C47	0.056	0.859649	0.892857	0.0675273	0.127341	0.816794	0.756345	0.947037	0.943662	0.916844	0.363636	0.156028	0.842839	0.972851	0.968051	0.20339	0.0169779	0.873288	0.269406	0.902369	0.968586	0.985423	0.692308	0.761905	0.957317	0.786561	0.907104	0.713287	0.916955	0.829653	0.95	0.909091	0.664459	0.933464	0.944882	0.878788	0.816	0	0.768915	0.293139	0.960087	0.817647	0.96875	0.961538	0.681818	0.188761	0.952512	0.931818	0.20332
CUPS_C48	0.0714286	0.926829	0.95	0.756592	0.0454545	0.924051	0	0.876364	0.752381	1	0	0	0.967963	0.903846	0.929825	0.657895	0	0.976471	0	0.978992	0.944954	0.981651	1	1	0.75	0.192308	1	0.645833	0.958904	0.876812	1	1	0.959064	0.980392	0.944444	1	0.305556	0.75	0.894837	0.102564	0.625698	0.901734	0.65	1	0	0.22082	0.985507	0.8	0
CUPS_C49	0.945652	0.748466	0.826374	0.227821	0.0534351	0.791139	0	0.913408	0.930769	0.922481	0.974576	0.673387	0.924609	0.913295	0.854962	0.289855	0.0373333	0.853774	0.530303	0.83165	0.968119	0.97541	1	0.958333	0.805556	0.834951	1	1	0.893216	0.990196	0.893491	1	0.852761	0.666667	0.933333	0.914286	0.208333	0	0.89128	0.300633	0.950311	0.986072	0.936508	0	0.0208333	0.77204	0.928728	0.935484	0.202381
CUPS_C5	0.154206	0.481481	0.836765	0.108463	0.647059	0.8	0	0.949163	0.982833	0.943103	0.698667	0.0833333	0.9375	0.881988	0.944206	0.457143	0.199892	0.941406	0.587387	0.767598	0.95575	0.907514	0.776119	0.944444	0.888889	0.368217	1	0.529412	0.96517	0.935035	0.903537	1	0.72	0.89375	0.956938	0.967742	0.472973	0.130435	0.865352	0.0461049	0.873978	0.960552	0.937743	0.897436	0.242268	0.50223	0.919589	0.972222	0.238095
CUPS_C50	0.545455	0.939394	0.437681	0.767581	0	0.973154	0.0175439	0.912949	0	0.747573	0.422764	0.32	0.644654	0.47619	0.657534	0.515152	0.0208333	0.837104	0.193548	0.313793	0.962366	0.984694	0.40625	1	1	0.52	0.987013	0.979167	0.896494	0.986239	0.970149	1	0.606164	0.933824	0.9	1	0.813953	0	0.62963	0.235849	0.95092	0.763848	0.984	0	0.0461538	0.889546	0.981358	1	0.272727
CUPS_C6	0.859116	0.815884	0.935616	0.77409	0.122727	0.921538	0	0.962057	0.988701	0.962963	0.96565	0.761111	0.927602	0.860606	0.898438	0.694853	0.138567	0.934641	0.324645	0.798013	0.975377	0.989247	0.930233	0.333333	0.713415	0.895636	0.352941	0.900398	0.944346	0.922819	0.976316	1	0.7981	0.928317	0.906404	0.99422	0.561905	0.326039	0.889779	0.0357143	0.934773	0.985989	0.839161	0.722222	0.810409	0.970382	0.94236	1	0.92638
CUPS_C8	0.047619	0.145455	0.459108	0.516267	0.257692	0.747049	0.219355	0.930786	0.642361	0.725806	0.282878	0.130081	0.499071	0.913699	0.275194	0.752747	0.275301	0.28133	0.0538033	0.386071	0.842718	0.921626	0.148148	0.5	0.710938	0.724919	0.911243	0.897106	0.575716	0.864947	0.930097	0.315789	0.24106	0.844991	0.806763	0.766467	0.232759	0.025	0.504278	0.109043	0.867519	0.617336	0.522727	1	0.0758621	0.720946	0.8279	0.98125	0.201493
CUPS_C9	0.385965	0.807692	0.897087	0.275501	0.227273	0.879464	0.15	0.945148	0.710145	0.953782	0.333333	0.164773	0.925385	0.628763	0.806202	0.823529	0.0135542	0.497076	0.539007	0.822443	0.987765	1	0.939394	0.826087	0.747475	0.661017	0.777778	0.816	0.902439	0.934363	0.917722	1	0.845528	0.945	0.950617	1	0.225	0	0.865949	0.0572917	0.943338	0.902439	0.872727	0.666667	0	0.861671	0.941844	0.977273	0.136986
[truncated: 2,744 more columns]
